1 **Structural basis of ribosomal RNA transcription regulation**

2

3 Yeonoh Shin<sup>1,a</sup>, M. Zuhaib Qayyum<sup>1,a</sup>, Danil Pupov<sup>2</sup>, Daria Esyunina<sup>2</sup>, Andrey Kulbachinskiy<sup>2</sup>  
4 and Katsuhiko S. Murakami<sup>1,\*</sup>

5

6 <sup>1</sup>Department of Biochemistry and Molecular Biology, Pennsylvania State University, University  
7 Park, PA 16802

8 <sup>2</sup>Institute of Molecular Genetics, Russian Academy of Sciences, Moscow 123182, Russia

9

10 <sup>a</sup>Y.S. and M.Z.Q. contributed equally to this work.

11

12 \*Correspondence: [kum14@psu.edu](mailto:kum14@psu.edu)

13

14

15 **Ribosomal RNA (rRNA) is the most highly expressed gene in rapidly growing bacteria and**  
16 **is drastically downregulated under stress conditions by the global transcriptional regulator**  
17 **DksA and the alarmone ppGpp. To reveal the mechanism of highly regulated rRNA**  
18 **transcription, we determined cryo-electron microscopy structures of the *Escherichia coli***  
19 **RNA polymerase (RNAP)  $\sigma^{70}$  holoenzyme at different steps of rRNA promoter recognition**  
20 **with and without DksA/ppGpp. RNAP contacts the UP element of rRNA promoter using the**  
21 **dimerized  $\alpha$  subunit carboxyl-terminal domain and scrunches the template DNA with the**  
22  **$\sigma$ finger and  $\beta$ 'lid to select a transcription start site favorable for rRNA expression. Promoter**  
23 **DNA binding to RNAP induces conformational change of the  $\sigma$  domain 2 that opens a gate**  
24 **for DNA loading and ejects  $\sigma_{1.1}$  from the RNAP cleft to facilitate open complex formation.**  
25 **DksA/ppGpp binding to RNAP also opens the DNA loading gate, but it is not coupled to  $\sigma_{1.1}$**   
26 **ejection and impedes the open complex formation of the rRNA promoter due to its G+C rich**  
27 **discriminator sequence. Mutations in  $\sigma_{1.1}$  or the  $\beta$ 'lid stabilize the RNAP and rRNA**  
28 **promoter complex and decrease its sensitivity to DksA/ppGpp. These results provide a**  
29 **molecular basis for exceptionally active rRNA transcription and for its vulnerability to**  
30 **DksA/ppGpp.**

31  
32 Bacteria sense the availability of nutrition and adjust ribosome biogenesis to optimize their growth.  
33 The rate of ribosome biogenesis is primarily determined by rRNA transcription<sup>1,2</sup>, which  
34 constitutes as much as 70 % of total transcription and is initiated approximately every second from  
35 each of the seven operons (*rrnA-E* and *rrnG-H*) in *E. coli* during exponential growth<sup>3</sup>. However,  
36 it is drastically repressed under stress conditions such as nutrient-starved stationary phase<sup>4</sup>. rRNA  
37 expression is regulated at the initiation stage of RNA synthesis, including RNAP binding to  
38 promoter DNA, unwinding the DNA and escaping from the promoter.

39 The promoters (e.g., *rrnBP1*) for expressing rRNA operons are unique compared with other  
40 promoters, including 1) the A+T rich UP element located upstream of the -35 element (from -60  
41 to -40); 2) the G+C rich discriminator sequence downstream of the -10 element (from -8 to -1);  
42 and 3) the transcription start site (TSS) located 9 bases downstream from the -10 element (**Fig. 1A,**  
43 **Supplemental Fig. 1A**). The UP element is recognized by the carboxyl-terminal domain of the  $\alpha$   
44 subunit ( $\alpha$ CTD) and enhances rRNA transcription by more than 30-fold<sup>5</sup>. The G+C rich  
45 discriminator and unusual TSS selection make the open complex (RPO) unstable, but this facilitates

46 promoter escape by reducing the abortive RNA cycle prior to the productive RNA elongation stage  
47 <sup>6</sup>. These promoter elements play key roles in the wide range of rRNA transcription regulation  
48 between optimized and nonoptimized growth conditions.

49 rRNA transcription activity is regulated by the concentrations of two molecules - the initiating  
50 ribonucleotide (iNTP) (ATP in the case of *rrnBP1*) <sup>7</sup> and the bacterial alarmone ppGpp (guanosine  
51 tetraphosphate, aka “magic spot”), which is an allosteric effector of the RNAP-binding regulator  
52 DksA <sup>8-10</sup>. The presence of high iNTP allows RNAP to break contacts with the promoter in the  
53 intrinsically unstable rRNA RPo, allowing escape to transcription elongation. However, the iNTP-  
54 limited condition shifts the equilibrium to favor early intermediates, including the closed complex  
55 (RPc), which is further enhanced by DksA/ppGpp binding to RNAP <sup>4</sup>. The ppGpp concentration  
56 is increased under stress conditions, which enhances DksA-mediated rRNA transcription  
57 repression by stabilizing DksA in a functionally important binding mode.

58 The majority of bacterial RNAP-DNA complex structures determined by X-ray crystallography  
59 contain short promoter DNA fragments with a premelted transcription bubble that mimics RPo to  
60 maximize its stability <sup>11,12</sup>. These studies explained the structural basis of promoter recognition  
61 and transcript initiation but left unexplored the interactions of RNAP with duplex DNA around the  
62 UP element (via  $\alpha$ CTDs) and the contacts with the -10 element (via  $\sigma$  domain 2, residues 96-127  
63 and 373-456 in  $\sigma^{70}$ ) in the RPc and the scrunched DNA bubble in the stressed RPo formed with  
64 the rRNA promoters.

65 Cryo-electron microscopy (cryo-EM) structures of the *E. coli* RNAP-*rpsTP2* promoter complex  
66 with a DksA homolog TraR revealed the RPo formation pathway in the presence of TraR, with  
67 stepwise RNAP conformational changes <sup>13</sup>. However, the *rpsTP2* promoter for expressing  
68 ribosomal protein S20 is distinct from the *rrnBP1* promoter in that it contains a G+C rich UP  
69 element and the TSS 7 bases downstream from the -10 element; therefore, it could not reveal the  
70 pathway for rRNA promoter complex formation and the mechanism of rRNA transcription  
71 regulation. Here, we used cryo-EM to visualize the RNAP and *rrnBP1* complex in the RPc and  
72 RPo stages and two intermediates with DksA/ppGpp on the way to RPo formation.

73

#### 74 **Cryo-EM structure of the RNAP and *rrnBP1* promoter closed complex (RPc)**

75 We preincubated RNAP with *rrnBP1* promoter DNA (**Fig. 1A**) at 37 °C for 5 min prior to cryo-  
76 EM grid preparation. In a separate cryo-EM grid preparation, we also tested adding iNTPs (ATP

77 and the nonhydrolyzable nucleotide CMPCPP) to stabilize the RNAP-*rrnBP1* complex. In the  
78 course of cryo-EM data processing, 3D classification revealed 2 distinct structures based on the  
79 differences in the UP element (from -60 to -40), the downstream DNA (from -14 and +20) and the  
80 conformation of the  $\sigma$  factor (Methods, **SFigs. 2 and 3**), corresponding to the RPc and RPo.  
81 The first class represents the RNAP-*rrnBP1* closed complex (RPc) with an overall resolution of  
82 4.14 Å (**STable 1**). The cryo-EM density shows that RNAP binds the duplex DNA from -60 to +3  
83 (**Fig. 1B, SFig. 4, SMovie 1**), but the density of downstream DNA beyond position +4 is not  
84 traceable. Instead, a second DNA binds to the RNAP cleft due to the ejection of  $\sigma_{1.1}$  from the  
85 RNAP cleft during RPc formation as described below.  
86 The cryo-EM density for both  $\alpha$ CTDs (residues 248-329), the linkers (residues 236-247)  
87 connecting to  $\alpha$ NTDs (residues 1-235), and the UP element DNA were traceable in the RPc,  
88 allowing us to investigate how each  $\alpha$ CTD binds to the UP element unambiguously (**Fig. 1C,**  
89 **SMovie 1**). Two  $\alpha$ CTDs form a head-to-tail dimer and bind DNA side-by-side in the middle of  
90 the UP element (-51 to -48 on nontemplate DNA (ntDNA) and -54 to -50 on template DNA  
91 (tDNA)), which is in good agreement with the DNA footprinting results <sup>14</sup>. Although  $\alpha$  subunits  
92 form a homodimer, two  $\alpha$  subunits play different roles in RNAP, with one ( $\alpha_1$ ) adjacent to the  $\beta$   
93 subunit and the other ( $\alpha_2$ ) adjacent to the  $\beta'$ . Compared to the  $\alpha_2$ CTD, the  $\alpha_1$ CTD is positioned  
94 proximally to the -35 element, which is consistent with the DNA cleavage by hydroxyl radicals  
95 from chelated Fe at each of the two  $\alpha$ CTDs <sup>15</sup>. The side chains of R265 and N294 from both  
96  $\alpha$ CTDs are inserted into the DNA minor groove, and basic residues (K291 and K298) are involved  
97 in salt bridges with the DNA phosphate backbone (**SFig. 5**). The linkers of both  $\alpha$  subunits are  
98 fully extended, and slight DNA bending centered at the -37 position is required for the  $\alpha$ CTDs  
99 binding to the UP element (**Fig. 1C**). Consistent with this observation, shortening of the linkers by  
100 only three amino acids reduces *rrnBP1* transcription <sup>16</sup>. Several studies have proposed that distant  
101 upstream DNA (near the -100 position) warps around RNAP on the RPo formation pathway, and  
102 the interaction of  $\alpha$ CTDs and the UP element is one of the major driving forces for this DNA  
103 wrapping <sup>17,18</sup>. However,  $\alpha$ CTDs do not bend the DNA around its binding site in the RPc structure,  
104 indicating that these contacts may not contribute to the DNA wrapping by RNAP.  
105 The RPc structure shows how  $\sigma_2$  binds the duplex form of the -10 element. The DNA encoding  
106 the -10 element is anchored by  $\sigma$  domain 2 and slightly bends around the upstream edge of the -10



107 element, allowing the downstream part beyond the -10 element to reach the other side of the RNAP  
108 cleft comprising the  $\beta$  protrusion domain (**Fig. 1B, SMovie 1**). The  $\sigma$  region 2.3 ( $\sigma_{2.3}$ , residues  
109 417-434) contacts the -10 element by fitting into the DNA major groove without any amino acid–  
110 DNA base interaction, indicating that  $\sigma_{2.3}$  recognizes the shape and/or curvature around the -10  
111 element. This finding is in agreement with the previous proposal<sup>19</sup> that  $\sigma^{70}$  does not contact the -  
112 10 element DNA bases when it is in duplex form.

113

### 114 **Cryo-EM structure of the RNAP and *rrnBP1* promoter open complex (RPo)**

115 The RNAP-*rrnBP1* open complex (RPo) was determined with an overall resolution of 3.5 Å  
116 (**STable 1**). The cryo-EM density covers DNA from -44 to +20, including an open bubble from -  
117 13 to +2 and the downstream DNA accommodated in the RNAP cleft (**Fig. 2A, SFig. 4, SMovie**  
118 **2**). In contrast to the RPo,  $\alpha$ CTDs and the UP element are disordered. Basic residues in the  $\beta$ lobe  
119 (K163, K169, K191, R202 and K203),  $\beta'$ jaw (K1151, K1167, K1170, K1172 and R1174) and  
120  $\beta'$ clamp (R133, K213, K216, K219 and R311) participate in the interaction with downstream DNA  
121 to stabilize the RPo (**Fig. 2B**). The importance of these interactions in rRNA transcription  
122 regulation is supported by the isolation of  $\Delta$ *dksA* suppressor mutations in these domains<sup>20,21</sup>. The  
123  $\beta$ gate loop ( $\beta$ GL, residues 368-378) in the  $\beta$ lobe domain contacts  $\sigma$  regions 1.1 ( $\sigma_{1.1}$ , residues 1-  
124 95) and 1.2 ( $\sigma_{1.2}$ , residues 96-127) to enclose the RNAP cleft. The  $\beta$ GL,  $\sigma_{1.2}$  and  $\sigma_{2.1}$  (residues  
125 373-396) contact the ntDNA strand of the discriminator from positions -8 to -6 (**Fig. 2C, SMovie**  
126 **3**); consistently, the  $\beta$ GL deletion destabilizes the RPo and shifts the TSS to the -3A position<sup>22</sup>.  
127 The RNAP and *rrnBP1* complex starts RNA synthesis at the position 9 bp downstream from the -  
128 10 element (+1A), which requires DNA scrunching in the open complex<sup>23</sup>.

129 Nucleotide substitutions in several promoter positions, including the discriminator region, were  
130 shown to shift the TSS at *rrnBP1* at position 6 bp downstream from the -10 element (-3A) and  
131 stabilize the complex, making it less sensitive to DksA/ppGpp. The RPo structure positioned +1A  
132 tDNA at the active site and revealed the mechanism of DNA scrunching, in which the G-7 base of  
133 tDNA fits into a pocket surrounded by the  $\beta'$ lid,  $\sigma$ finger ( $\sigma$  region 3.2) and C-6 base (**Fig. 2D,**  
134 **SMovie 3**). The importance of the G-7 base for the DNA scrunching is underscored by its  
135 conservation in all seven rRNA promoters in *E. coli* and some rRNA promoters in other  
136 proteobacteria (**SFig. 1**). Highly conserved D256 ( $\beta'$ lid) and F522 ( $\sigma$ finger) residues form a salt

137 bridge and Van der Waals interaction with the G-7 base, respectively. Consistently, we found that  
138 an alanine substitution of residue D256 ( $\beta'$ lid) significantly stabilizes RNAP complexes with the  
139 *rrnBP1* promoter (promoter complex half-life  $t_{1/2}$  of  $135 \pm 16$  s vs.  $34 \pm 7$  s for wild-type RNAP)  
140 (**Figs. 3A and B**). The  $\sigma$ finger deletion<sup>24</sup> or the G-7C substitution<sup>23</sup> was shown to shift the TSS  
141 to the -3A position, likely eliminating the open complex scrunching.

142 Open complex scrunching also facilitates the promoter escape of RNAP by reducing abortive RNA  
143 synthesis<sup>23</sup>. Robust RNAP escape is required to initiate rRNA transcription approximately every  
144 second from each of the seven operons to meet the demand for ribosome synthesis in rapidly  
145 dividing *E. coli*<sup>3</sup>. Compared with RPo-*rpsTP2* containing nonscrunched tDNA<sup>13</sup>, RPo-*rrnBP1*  
146 shifts the  $\sigma$ finger  $\sim 5$  Å away from tDNA, allowing accommodation of one additional base of RNA  
147 before its 5'-end reaches the  $\sigma$ finger (**Fig. 2E**). Since the  $\sigma$ finger is the major obstacle to promoter  
148 escape<sup>25-27</sup>, the partially displaced  $\sigma$ finger in the rRNA promoter RPo due to open complex  
149 scrunching may decrease abortive RNA synthesis, promoting the robust expression of rRNA.

150

### 151 **Cryo-EM structures of the RNAP and *rrnBP1* promoter complex with DksA/ppGpp (RP-** 152 **DksA/ppGpp)**

153 To reveal how DksA/ppGpp binding to RNAP downregulates rRNA transcription, we visualized  
154 the RNAP, *rrnBP1* and DksA/ppGpp complex (RP-DksA/ppGpp) by cryo-EM (**STable 1, SFig.**  
155 **6**). The classification of the cryo-EM data gave rise to two structures that differed mainly within  
156 the RNAP cleft; the first class shows the globular density corresponding to  $\sigma_{1.1}$  (class I, RP1-  
157 DksA/ppGpp), and the second class shows the right-handed helical density corresponding to the  
158 downstream DNA (class II, RP2-DksA/ppGpp) (**Figs. 4A and B, SMovie 4**). In addition, the  
159 positions of  $\beta$ lobe/Si1 are different in these classes (**Fig. 4C**).

160 Both classes show ppGpp binding at sites 1 and 2 and DksA binding at the RNAP secondary  
161 channel, as observed in a previous X-ray crystallography study<sup>28</sup>. DksA binds RNAP with its  
162 globular domain (G domain, contacts with the  $\beta'$ rim helix), coiled-coil tip (CC tip, contacts with  
163 the active site), CC (contacts with the bridge helix, the trigger loop and linkers connecting to the  
164  $\beta'$ Si3), and C-terminal  $\alpha$  helix (CT-helix, contacts with the  $\beta$  lobe/Si1 domain) (**Fig. 4A, SMovie**  
165 **4**). The CC of DksA prevents trigger helix formation and blocks NTP entry from the secondary  
166 channel, indicating that DksA must be displaced before RNAP can initiate RNA synthesis<sup>28,29</sup>.

167 Both classes show the duplex DNA density from positions -42 to -14 (from the downstream edge  
168 of the UP element to the upstream edge of the -10 element) and also show the ssDNA density of  
169 the nontemplate strand of the -10 element (**SFig. 4**). RP1-DksA/ppGpp retains  $\sigma_{1.1}$  in the RNAP  
170 cleft, indicating that it represents an early stage intermediate during the RPc to RPo transition.  
171 While the transcription bubble is likely partially open in RP1-DksA/ppGpp, the density of ntDNA  
172 from -5 to +20 and of tDNA from -13 to +20 is not traceable. Analysis of RP1-DksA/ppGpp  
173 reveals a DksA/ppGpp-induced conformational change in  $\beta$ lobe/Si1,  $\beta'$ jaw/Si3 and  $\beta'$ clamp,  
174 opening the downstream DNA cleft in RNAP and likely reducing the stability of RPo (**Fig. 4D**).  
175 Furthermore, the conformational change in  $\beta$ lobe/Si1 establishes a new contact with the DksA CT-  
176 helix (**Fig. 4C, SMovie 4**); the deletion of  $\beta$ Si1 reduces the DksA affinity to RNAP and impairs  
177 its function<sup>30</sup>. Alanine substitution of an aspartate residue in the CT-helix directly involved in this  
178 interaction (D137A) decreases *rrnBP1* inhibition by DksA both in the absence and in the presence  
179 of ppGpp (**Fig. 3C**).

180 The RP2-DksA/ppGpp complex contains downstream DNA (from +3 to +20) within the RNAP  
181 cleft, but the density of the DNA bubble (from -8 to +2) is not traceable (**Fig. 4B, SFig. 4**),  
182 suggesting that it represents a late stage intermediate before forming the RPo. The  $\sigma_{1.1}$  density is  
183 not traceable due to its ejection from the RNAP cleft. The conformations of  $\beta$ lobe/Si1 and  $\beta'$ clamp  
184 are akin to the RPo conformation, and the CT-helix of DksA does not contact with the  $\beta$ lobe/Si1  
185 (**Fig. 4C**). Therefore, the transition between the two complexes may reduce the DksA affinity to  
186 RNAP and trigger its dissociation, which is an obligatory process to initiate RNA synthesis<sup>28,29</sup>.

187

### 188 **Conformational change in the $\sigma$ domain 2 is coupled to $\sigma_{1.1}$ ejection during RPc formation**

189 The RPc structure revealed a significant conformational change in the  $\sigma$  domain 2 (from  $\sigma$  regions  
190 1.2-2.4 including  $\sigma$  nonconserved region ( $\sigma_{\text{NCR}}$ , residues 128-372)) comparison with the apo-form  
191 holoenzyme RNAP<sup>31</sup> or the RPo containing *rrnBP1* (this study). Particularly,  $\sigma_{1.2}/\sigma_{\text{NCR}}$  undergo a  
192 rigid rotation toward the clamp to establish contact with the  $\beta'$ clamp-toe ( $\beta'$ CT, residues 143 to  
193 180) (**RPc, Fig. 5A**). Although this interaction was not observed in any previous structural study,  
194 it was predicted based on the biochemical/genetic analysis of RNAP promoter escape and early  
195 elongation pausing<sup>32</sup>. It was shown that the interaction of the  $\sigma_{\text{NCR}}$  and  $\beta'$ CT is important for

196 promoter escape and hinders early elongation pausing, and amino acid substitutions at the interface  
197 modulate both processes (**SFig. 7**).

198 The  $\beta$ GL contacts  $\sigma_{1.1}$  and  $\sigma_{1.2}$  to enclose the RNAP cleft in the apo-form RNAP, which prevents  
199 DNA loading (**apo, Fig. 5A**), but the same interaction in the RPo stabilizes the open complex  
200 bubble (**Fig. 2B**). In the case of RPe, the  $\sigma_{1.2}/\sigma_{\text{NCR}}$  rotation disrupts the  $\beta$ GL and  $\sigma$  contact and  
201 widens the gap that allows discriminator DNA to enter the RNAP cleft for open complex bubble  
202 formation (**RPe, Fig. 5A**). Compared with the apo-form RNAP, the  $\sigma_{\text{NCR}}$  and  $\beta'$ CT interaction in  
203 the RPe closes the  $\beta'$ clamp, resulting in the ejection of  $\sigma_{1.1}$  from the RNAP cleft due to the steric  
204 clash between the  $\beta'$ clamp and  $\sigma_{1.1}$  (**Fig. 5B**).

205  $\sigma_{\text{NCR}}$  contains a highly negatively charged region (acidic loop, residues 167-213) (**SFig. 8A**). Its  
206 conformation has not been determined due to its dynamic behavior, but since it is located near  $\sigma_{2.3}$ ,  
207 it seems to prevent nonspecific DNA binding to  $\sigma_{2.3}$  (**SFig. 8B**). We speculate that after RNAP  
208 recognizes the UP and -35 elements, loading of the -10 element DNA onto  $\sigma$  domain 2 triggers  
209  $\sigma_{\text{NCR}}$  rotation due to charge-charge repulsion. After DNA unwinds around the -10 element,  $\sigma_{\text{NCR}}$   
210 returns to its position, as seen in the RPo akin to the apo-form RNAP, and may enhance the  
211 electrostatic interaction between  $\sigma_2$  and -10 element DNA (**SFig. 8C**). Consistently, deletion of  
212 the acidic loop ( $D\sigma_{\text{AL}}$ ) had a weak destabilizing effect on the *rrnBP1*-RNAP complex, without  
213 strong effects on DksA inhibition (**Fig. 3**).

214 DksA/ppGpp binding to RNAP also partially opens the DNA loading gate by moving the  $\beta$ lobe/Si1  
215 away from  $\sigma_{1.1}/\sigma_{1.2}$ , but it is not coupled to the  $\sigma_{1.1}$  ejection from the RNAP cleft (**R\_DksA, Fig.**  
216 **5A**). Similarly, the structures of the RNAP-TraR complex and several RNAP-DNA complex  
217 intermediates prepared in the presence of TraR also showed the opening of the DNA loading gate  
218 by shifting the  $\beta$ lobe/Si1 position but did not show  $\sigma_{1.2}/\sigma_{\text{NCR}}$  rotation or  $\sigma_{1.1}$  ejection from the  
219 RNAP cleft (**SFig. 9A**)<sup>13,31</sup>.

220 To understand the role of  $\sigma_{1.1}$  in rRNA transcription, we characterized an RNAP derivative lacking  
221  $\sigma_{1.1}$  ( $\Delta\sigma_{1.1}$ -RNAP) in terms of its *rrnBP1* transcription activity and sensitivity to DksA. Compared  
222 to the wild-type (WT) RNAP,  $\Delta\sigma_{1.1}$ -RNAP increases *rrnBP1* complex stability, both in the absence  
223 of DksA (increase  $t_{1/2}$  from 34 s to 115 s) and in its presence (increase  $t_{1/2}$  from  $\ll 10$  s to 20 s)  
224 (**Figs. 3A and B**), and it decreases sensitivity to DksA (**Fig. 3C**). The results indicate that  $\sigma_{1.1}$   
225 plays an important role in rRNA transcription and its regulation by DksA/ppGpp.

226

## 227 **Mechanism of rRNA-specific transcription inhibition by DksA/ppGpp**

228 Structural and biochemical studies of bacterial RNAP transcription suggest that the order of DNA  
229 loading around the TSS and DNA opening during promoter recognition may be interchangeable  
230 (i.e., DNA melts first outside RNAP (melt-load) or DNA melts after loading inside the RNAP cleft  
231 (load-melt)) depending on  $\sigma$  factors, promoters, transcription factors and conditions <sup>26,33</sup>. By  
232 combining structural and biochemical data from this and previous studies, we propose two  
233 pathways of RPo formation (**Fig. 6, SMovie 5**). We hypothesize that RNAP uses alternative  
234 mechanisms of RPo formation, requiring opening of the DNA loading gate (disrupting the  $\beta$ GL  
235 contact to  $\sigma$ ),  $\sigma_{1.1}$  ejection from the DNA binding channel, and unwinding of the -10 element plus  
236 discriminator DNA, depending on the absence or presence of DksA/ppGpp.

237 Without DksA/ppGpp (**top, RPo formation**), free RNAP (**R**) binds promoter DNA (**RPc**), which  
238 opens the DNA loading gate by ejecting  $\sigma_{1.1}$  from the RNAP cleft, making RNAP competent for  
239 melting and loading discriminator DNA (**RPI**) into the RNAP cleft, which results in efficient RPo  
240 formation. The scrunched open complex (**RPo**) releases RNAP from the rRNA promoter rapidly  
241 to proceed with RNA synthesis (**EC**).

242 In the presence of DksA/ppGpp (**bottom, RPo formation with DksA/ppGpp**), DksA/ppGpp  
243 binding to RNAP rotates the  $\beta$ lobe/Sil to DksA, which partially opens the DNA loading gate by  
244 disrupting the interaction between GL and  $\sigma$  (**R-DksA**). However,  $\sigma_{1.1}$  ejection is uncoupled from  
245 RPc formation (**RPc-DksA**), and  $\sigma_{1.1}$  remains inside the RNAP cleft until late stages of the open  
246 complex formation (**RPI-DksA**). This pathway favors the melt-load model for RPo formation  
247 (**RPo-DksA**), in which DNA is accommodated above the  $\beta$ lobe domain and unwinds outside the  
248 RNAP cleft (**SFig. 9B**) followed by single-stranded tDNA entry into the active site of RNAP <sup>13</sup>.  
249 DNA unwinding outside the RNAP cleft is unfavorable in the DksA/ppGpp-free RNAP due to a  
250 steric clash of the discriminator DNA with the  $\beta$ lobe. The progression of DNA unwinding from  
251 the -10 element to the TSS is energetically less favorable for DksA/ppGpp-sensitive promoters  
252 (e.g., *rrnBP1* and *rpsTP2*) containing the G+C rich discriminator than for less DksA/ppGpp-  
253 sensitive promoters (e.g., T7A1 and RNA1) containing an A+T rich discriminator (**SFig. 10**). *E.*  
254 *coli* promoters that are sensitive to DksA/ppGpp contain G+C rich discriminators <sup>34</sup>. Replacing the  
255 A+T rich discriminator of the *uspA* promoter, which is positively regulated by DksA/ppGpp, with  
256 the one from the *rrnBP1* promoter makes the *uspA* hybrid promoter sensitive to DksA/ppGpp <sup>35</sup>,

257 indicating that discriminator sequences play an important role in responding to DksA/ppGpp.  
258 Although DksA could inhibit transcription regardless of the promoter bound to RNAP, by  
259 inhibiting NTP entry and folding trigger helix, stable promoter complex formation decreases DksA  
260 binding to RNAP, thus relieving the inhibition<sup>28,29</sup>. The completion of discriminator DNA loading  
261 into the RNAP cleft can likely occur not only in DksA/ppGpp-insensitive promoters but also in a  
262 fraction of the rRNA promoter complexes to maintain a basal level of rRNA expression under  
263 stress growth conditions. This likely pushes the  $\beta$ lobe/Si1 away from the CT-helix of DksA (**RPo-**  
264 **DksA**), allowing rapid dissociation of DksA from the RNAP secondary channel (**RPo**) followed  
265 by initiate transcription (**EC**).

266 In this study, we revealed two alternative pathways for opening the gate of the DNA binding  
267 channel depending on the absence or presence of DksA/ppGpp (**Fig. 6, SMovie 5**) and shed light  
268 on the functions of  $\sigma_{1.1}$ ,  $\sigma_{1.2}$ ,  $\sigma_{\text{NCR}}$  and  $\beta$ lobe/Si1 domains to explain how DksA/ppGpp specifically  
269 inhibits rRNA transcription. Intriguingly, DksA/ppGpp is able to activate transcription at some  
270  $\sigma^{70}$ -promoters<sup>36</sup> and promoters recognized by alternative  $\sigma$  factors, including  $\sigma^{\text{S}}$ <sup>37</sup> and  $\sigma^{\text{E}}$ <sup>38</sup>.  
271 Neither  $\sigma^{\text{S}}$  nor  $\sigma^{\text{E}}$  contains  $\sigma_{1.1}$  or  $\sigma_{\text{NCR}}$ , and the  $\sigma^{\text{S}}$  and  $\sigma^{\text{E}}$  holoenzymes use the  $\beta$ GL to close the  
272 DNA loading gate<sup>39,40</sup>. DNA binding to the  $\sigma$  domain 2 of  $\sigma^{\text{S}}$  or  $\sigma^{\text{E}}$  cannot facilitate opening of  
273 the DNA loading gate, as described in the case of the  $\sigma^{70}$  holoenzyme (**Fig. 6 top**). However,  
274 DksA/ppGpp binding followed by movement of the  $\beta$ lobe/Si1 domain could still open the DNA  
275 loading gate of these RNAP holoenzymes as described above (**Fig. 6 bottom**), possibly explaining  
276 the stimulatory effects of DksA/ppGpp on transcription from some  $\sigma^{\text{S}}$ - and  $\sigma^{\text{E}}$ -dependent  
277 promoters. Further structural analyses of the  $\sigma^{70}$ ,  $\sigma^{\text{S}}$  and  $\sigma^{\text{E}}$  RNAP promoter complex with  
278 DksA/ppGpp, together with biochemical characterization of RNAP and promoter functions, will  
279 be needed to complete our understanding of DksA/ppGpp-dependent transcription regulation.

280

## 281 REFERENCES

### 282 Uncategorized References

- 283 1 Nomura, M. Regulation of ribosome biosynthesis in *Escherichia coli* and *Saccharomyces*  
284 *cerevisiae*: diversity and common principles. *J Bacteriol* **181**, 6857-6864, (1999).
- 285 2 Zengel, J. M. & Lindahl, L. Diverse mechanisms for regulating ribosomal protein synthesis  
286 in *Escherichia coli*. *Prog Nucleic Acid Res Mol Biol* **47**, 331-370, (1994).



- 287 3 Bremer, H. & Dennis, P. P. Modulation of Chemical Composition and Other Parameters  
288 of the Cell at Different Exponential Growth Rates. *EcoSal Plus* **3**, (2008).
- 289 4 Gourse, R. L. *et al.* Transcriptional responses to ppGpp and DksA. *Annu Rev Microbiol* **72**,  
290 163-184, (2018).
- 291 5 Ross, W. *et al.* A third recognition element in bacterial promoters: DNA binding by the  
292 alpha subunit of RNA polymerase. *Science* **262**, 1407-1413, (1993).
- 293 6 Winkelman, J. T. & Gourse, R. L. Open complex DNA scrunching: A key to transcription  
294 start site selection and promoter escape. *Bioessays* **39**, (2017).
- 295 7 Gaal, T., Bartlett, M. S., Ross, W., Turnbough, C. L., Jr. & Gourse, R. L. Transcription  
296 regulation by initiating NTP concentration: rRNA synthesis in bacteria. *Science* **278**, 2092-  
297 2097, (1997).
- 298 8 Cashel, M. & Gallant, J. Two compounds implicated in the function of the RC gene of  
299 *Escherichia coli*. *Nature* **221**, 838-841, (1969).
- 300 9 Potrykus, K. & Cashel, M. (p)ppGpp: Still Magical? *Annual Review of Microbiology* **62**,  
301 35-51, (2008).
- 302 10 Hauryliuk, V., Atkinson, G. C., Murakami, K. S., Tenson, T. & Gerdes, K. Recent  
303 functional insights into the role of (p)ppGpp in bacterial physiology. *Nat Rev Microbiol* **13**,  
304 298-309, (2015).
- 305 11 Murakami, K. S., Masuda, S., Campbell, E. A., Muzzin, O. & Darst, S. A. Structural basis  
306 of transcription initiation: an RNA polymerase holoenzyme-DNA complex. *Science* **296**,  
307 1285-1290, (2002).
- 308 12 Zhang, Y. *et al.* Structural basis of transcription initiation. *Science* **338**, 1076-1080, (2012).
- 309 13 Chen, J. *et al.* Stepwise Promoter Melting by Bacterial RNA Polymerase. *Mol Cell*, (2020).
- 310 14 Newlands, J. T., Ross, W., Gosink, K. K. & Gourse, R. L. Factor-independent activation  
311 of *Escherichia coli* rRNA transcription. II. characterization of complexes of rrnB P1  
312 promoters containing or lacking the upstream activator region with *Escherichia coli* RNA  
313 polymerase. *J Mol Biol* **220**, 569-583, (1991).
- 314 15 Murakami, K., Kimura, M., Owens, J. T., Meares, C. F. & Ishihama, A. The two alpha  
315 subunits of *Escherichia coli* RNA polymerase are asymmetrically arranged and contact  
316 different halves of the DNA upstream element. *Proc Natl Acad Sci U S A* **94**, 1709-1714,  
317 (1997).



- 318 16 Fujita, N., Endo, S. & Ishihama, A. Structural requirements for the interdomain linker of  
319 alpha subunit of Escherichia coli RNA polymerase. *Biochemistry* **39**, 6243-6249, (2000).
- 320 17 Sreenivasan, R. *et al.* Fluorescence Resonance Energy Transfer Characterization of DNA  
321 Wrapping in Closed and Open Escherichia coli RNA Polymerase-lambdaP(R) Promoter  
322 Complexes. *Biochemistry* **55**, 2174-2186, (2016).
- 323 18 Doniselli, N. *et al.* New insights into the regulatory mechanisms of ppGpp and DksA on  
324 Escherichia coli RNA polymerase-promoter complex. *Nucleic acids research* **43**, 5249-  
325 5262, (2015).
- 326 19 Feklistov, A. & Darst, S. A. Structural basis for promoter-10 element recognition by the  
327 bacterial RNA polymerase sigma subunit. *Cell* **147**, 1257-1269, (2011).
- 328 20 Murphy, H. & Cashel, M. Isolation of RNA polymerase suppressors of a (p)ppGpp  
329 deficiency. *Methods Enzymol* **371**, 596-601, (2003).
- 330 21 Rutherford, S. T., Villers, C. L., Lee, J. H., Ross, W. & Gourse, R. L. Allosteric control of  
331 Escherichia coli rRNA promoter complexes by DksA. *Genes Dev* **23**, 236-248, (2009).
- 332 22 NandyMazumdar, M. *et al.* RNA polymerase gate loop guides the nontemplate DNA strand  
333 in transcription complexes. *Proc Natl Acad Sci U S A* **113**, 14994-14999, (2016).
- 334 23 Winkelman, J. T., Chandrangsu, P., Ross, W. & Gourse, R. L. Open complex scrunching  
335 before nucleotide addition accounts for the unusual transcription start site of E. coli  
336 ribosomal RNA promoters. *Proc Natl Acad Sci U S A* **113**, E1787-1795, (2016).
- 337 24 Pupov, D., Petushkov, I., Esyunina, D., Murakami, K. S. & Kulbachinskiy, A. Region 3.2  
338 of the sigma factor controls the stability of rRNA promoter complexes and potentiates their  
339 repression by DksA. *Nucleic acids research* **46**, 11477-11487, (2018).
- 340 25 Murakami, K. S., Masuda, S. & Darst, S. A. Structural basis of transcription initiation:  
341 RNA polymerase holoenzyme at 4 Å resolution. *Science* **296**, 1280-1284, (2002).
- 342 26 Mazumder, A. & Kapanidis, A. N. Recent Advances in Understanding sigma70-Dependent  
343 Transcription Initiation Mechanisms. *J Mol Biol* **431**, 3947-3959, (2019).
- 344 27 Kulbachinskiy, A. & Mustaev, A. Region 3.2 of the sigma subunit contributes to the  
345 binding of the 3'-initiating nucleotide in the RNA polymerase active center and facilitates  
346 promoter clearance during initiation. *J Biol Chem* **281**, 18273-18276, (2006).
- 347 28 Molodtsov, V. *et al.* Allosteric Effector ppGpp Potentiates the Inhibition of Transcript  
348 Initiation by DksA. *Molecular cell* **69**, 828-839 e825, (2018).

- 349 29 Stumper, S. K. *et al.* Delayed inhibition mechanism for secondary channel factor regulation  
350 of ribosomal RNA transcription. *Elife* **8**, (2019).
- 351 30 Parshin, A. *et al.* DksA regulates RNA polymerase in Escherichia coli through a network  
352 of interactions in the secondary channel that includes Sequence Insertion 1. *Proc Natl Acad*  
353 *Sci U S A* **112**, E6862-6871, (2015).
- 354 31 Chen, J. *et al.* E. coli TraR allosterically regulates transcription initiation by altering RNA  
355 polymerase conformation. *Elife* **8**, (2019).
- 356 32 Leibman, M. & Hochschild, A. A sigma-core interaction of the RNA polymerase  
357 holoenzyme that enhances promoter escape. *EMBO J* **26**, 1579-1590, (2007).
- 358 33 Glyde, R. *et al.* Structures of Bacterial RNA Polymerase Complexes Reveal the  
359 Mechanism of DNA Loading and Transcription Initiation. *Molecular cell* **70**, 1111-1120  
360 e1113, (2018).
- 361 34 Sanchez-Vazquez, P., Dewey, C. N., Kitten, N., Ross, W. & Gourse, R. L. Genome-wide  
362 effects on Escherichia coli transcription from ppGpp binding to its two sites on RNA  
363 polymerase. *Proc Natl Acad Sci U S A* **116**, 8310-8319, (2019).
- 364 35 Gummesson, B., Lovmar, M. & Nystrom, T. A proximal promoter element required for  
365 positive transcriptional control by guanosine tetraphosphate and DksA protein during the  
366 stringent response. *J Biol Chem* **288**, 21055-21064, (2013).
- 367 36 Paul, B. J., Berkmen, M. B. & Gourse, R. L. DksA potentiates direct activation of amino  
368 acid promoters by ppGpp. *Proc Natl Acad Sci U S A* **102**, 7823-7828, (2005).
- 369 37 Girard, M. E. *et al.* DksA and ppGpp Regulate the sigma(S) Stress Response by Activating  
370 Promoters for the Small RNA DsrA and the Anti-Adapter Protein IraP. *Journal of*  
371 *bacteriology* **200**, (2018).
- 372 38 Costanzo, A. *et al.* ppGpp and DksA likely regulate the activity of the extracytoplasmic  
373 stress factor sigmaE in Escherichia coli by both direct and indirect mechanisms. *Mol*  
374 *Microbiol* **67**, 619-632, (2008).
- 375 39 Li, L., Fang, C., Zhuang, N., Wang, T. & Zhang, Y. Structural basis for transcription  
376 initiation by bacterial ECF sigma factors. *Nat Commun* **10**, 1153, (2019).
- 377 40 Xu, J. *et al.* Crl activates transcription by stabilizing active conformation of the master  
378 stress transcription initiation factor. *Elife* **8**, (2019).

- 379 41 Murakami, K. S. X-ray crystal structure of *Escherichia coli* RNA polymerase sigma70  
380 holoenzyme. *J Biol Chem* **288**, 9126-9134, (2013).
- 381 42 Zivanov, J. *et al.* New tools for automated high-resolution cryo-EM structure determination  
382 in RELION-3. *Elife* **7**, (2018).
- 383 43 Zheng, S. Q. *et al.* MotionCor2: anisotropic correction of beam-induced motion for  
384 improved cryo-electron microscopy. *Nat Methods* **14**, 331-332, (2017).
- 385 44 Zhang, K. Gctf: Real-time CTF determination and correction. *Journal of structural biology*  
386 **193**, 1-12, (2016).
- 387 45 Punjani, A., Rubinstein, J. L., Fleet, D. J. & Brubaker, M. A. cryoSPARC: algorithms for  
388 rapid unsupervised cryo-EM structure determination. *Nat Methods* **14**, 290-296, (2017).
- 389 46 Pettersen, E. F. *et al.* UCSF Chimera--a visualization system for exploratory research and  
390 analysis. *J Comput Chem* **25**, 1605-1612, (2004).
- 391 47 Afonine, P. V. *et al.* Joint X-ray and neutron refinement with phenix.refine. *Acta*  
392 *Crystallogr D Biol Crystallogr* **66**, 1153-1163, (2010).
- 393 48 Emsley, P. & Cowtan, K. Coot: model-building tools for molecular graphics. *Acta*  
394 *Crystallogr D Biol Crystallogr* **60**, 2126-2132, (2004).
- 395 49 Svetlov, V. & Artsimovitch, I. Purification of bacterial RNA polymerase: tools and  
396 protocols. *Methods Mol Biol* **1276**, 13-29, (2015).
- 397 50 SantaLucia, J., Jr. A unified view of polymer, dumbbell, and oligonucleotide DNA nearest-  
398 neighbor thermodynamics. *Proc Natl Acad Sci U S A* **95**, 1460-1465, (1998).
- 399 51 Dienemann, C., Schwalb, B., Schilbach, S. & Cramer, P. Promoter Distortion and Opening  
400 in the RNA Polymerase II Cleft. *Mol Cell* **73**, 97-106 e104, (2019).

401

## 402 **METHODS**

403 **Purification of *E. coli* WT RNAP, RNAP derivatives, and DksA.** *E. coli*  $\sigma^{70}$  RNAP holoenzyme  
404 and DksA were purified as described previously<sup>28,41</sup>. *E. coli* RNAP derivatives were purified by  
405 the same method as WT RNAP.

406

407 **Preparation of *rrnBP1* DNA.** The *rrnBP1* promoter DNA was synthesized (IDT) according to  
408 the native *rrnBP1* sequence and annealed in a 40  $\mu$ L reaction mixture containing 10 mM Tris-HCl  
409 (pH 8.0), 50 mM NaCl, and 1 mM EDTA to a final concentration of 0.5 mM. The solution was

410 heated at 95 °C for 10 min, and then the temperature was gradually decreased to 22 °C. The  
411 sequence of the nontemplate strand is 5'-  
412 CAGAAAATTATTTTAAATTTTCCTCTTGTCAGGCCGGAATAACTCCCTATAATGCGCC  
413 ACCACTGACACGGACTCTACGAG-3'. The transcription start site is underlined, and the  
414 template sequence is 5'-  
415 CTCGTAGAGTCCGTGTCAGTGGTGGCGCATTATAGGGAGTTATTCCGGCCTGACAAG  
416 AGGAAATTTAAAATAATTTTCTG -3'.

417

418 **Cryo-EM sample preparation.** To prepare the RNAP and *rrnBP1* promoter complex, *E. coli*  $\sigma^{70}$   
419 RNAP (20  $\mu$ M) and *rrnBP1* promoter DNA (40  $\mu$ M) were preincubated for 5 min at 37 °C in buffer  
420 (10 mM HEPES, pH 8.0, 50 mM NaCl, 0.1 mM EDTA, 5 mM DTT and 5 mM MgCl<sub>2</sub>) followed  
421 by the addition of ATP and a nonhydrolyzable CMPCPP (cytidine-5'-[( $\alpha$ , $\beta$ )-  
422 methyleno]triphosphate, Jena Bioscience) (2 mM each). After mixing, the reaction was further  
423 incubated for 5 mins at 37 °C.

424 To prepare RP-DksA/ppGpp, *E. coli*  $\sigma^{70}$  RNAP (20  $\mu$ M) was preincubated with a 5-fold molar  
425 excess of DksA (100  $\mu$ M) and ppGpp (2 mM) for 5 min at 37 °C in buffer (10 mM HEPES, pH  
426 8.0, 50 mM NaCl, 0.1 mM EDTA, 5 mM DTT and 5 mM MgCl<sub>2</sub>). The *rrnBP1* promoter DNA (40  
427  $\mu$ M) was added to the reaction and further incubated for 5 mins at 37 °C. Before freezing the grids,  
428 8 mM CHAPSO (Hampton research) was added to the reaction. A 3.5  $\mu$ L sample was applied to a  
429 glow-discharged C-Flat Holey Carbon grid (Cu 2/1, 400 mesh), blotted and plunge-frozen in liquid  
430 ethane using a Vitrobot Mark IV (FEI, USA) with 95% humidity at 4 °C.

431

432 **Cryo-EM data acquisition.** The grid was imaged using a 300 keV Titan Krios (Thermo Fisher)  
433 microscope equipped with a K3 direct electron detector (Gatan) and controlled by the Latitude S  
434 (Gatan, Inc.) software at the National Cancer Institute's Cryo-EM Facility at Frederick. The  
435 defocus range was 1.0 – 3.0  $\mu$ m, and the magnification was 81,000X in electron counting mode  
436 (pixel size = 1.08 Å/pixel). Forty frames per movie were collected with a dose of 1.125 e<sup>-</sup>/Å<sup>2</sup>/frame,  
437 giving a total dose of 45 e<sup>-</sup>/Å<sup>2</sup>.

438

439 **Cryo-EM data processing.** The RNAP-*rrnBP1* complex with ATP/CMPCPP data was processed  
440 using Relion3.0.8<sup>42</sup>. A total of 8,315 movies were collected, aligned and dose weighted using

441 MotionCor2<sup>43</sup>. CTF fitting was performed with Gctf<sup>44</sup>. Initially, approximately 1,000 particles  
442 were manually picked to generate particle templates followed by automated picking, resulting in  
443 a total of 1,449,010 particles subjected to 2D classification. From the 2D classes, 1,442,810  
444 particles were chosen for the 3D classification to 4 classes. Poorly populated classes were removed,  
445 resulting in datasets of 541,257 (37%) particles for the first class (RPc) and 464,512 (32%)  
446 particles for the second class. The first class was further 3D classified without alignments twice to  
447 further clean the data, resulting in datasets of 67,187 particles. The particles were refined and  
448 postprocessed to generate the density map at 4.14 Å resolution. The resolution of the density map  
449 of the second class was 3.53 Å.

450 The RNAP-*rrnBP1* complex data were processed using Relion3.0.8. A total of 4748 movies were  
451 collected, aligned and dose weighted using MotionCor2. CTF fitting was performed with Gctf.  
452 Approximately 1,000 particles were manually picked to generate particle templates followed by  
453 automated picking, resulting in a total of 563,500 particles. Particles were 2D classified, and  
454 561,753 particles were chosen for the 3D classification. Of the four 3D classes, class 1 (RPo) was  
455 the most populated class (349,752 particles, 62%) and was autorefined. The map was  
456 postprocessed to give a structure of RPo at 3.53 Å.

457 The RP-DksA/ppGpp complex data were processed using cryoSPARC V2.9.0<sup>45</sup>. A total of 4,926  
458 movies were collected, and the movies were aligned, and dose weighted using Patch-motion  
459 correction. CTF fitting was performed with Patch-CTF estimation. Initially, approximately 1,000  
460 particles were manually picked to generate particle templates followed by automated picking,  
461 resulting in a total of 418,049 particles subjected to 2D classification. After two rounds of 2D  
462 classification to remove junk particles, 361,048 particles were used to generate two *ab initio*  
463 models. Junk particles were removed, resulting in a dataset of 275,629 particles chosen for the 3D  
464 classification (heterogenous refinement). Poorly populated classes were removed, resulting in a  
465 dataset of 49,995 particles to generate the density map at 3.62 Å resolution for the first class (RP1-  
466 DksA/ppGpp) and a dataset of 79,275 particles to generate the density map at 3.58 Å resolution  
467 for the second class (RP2-DksA/ppGpp). The particles were 3D autorefined without the mask and  
468 postprocessed (homogenous refinement).

469

470 **Structure refinement.** To refine the closed and open complex structures, the *E. coli* RNAP  
471 holoenzyme crystal structure (PDB: 4YG2) was manually fit into the cryo-EM density map using

472 Chimera<sup>46</sup> and real-space refined using Phenix<sup>47</sup>. In the real-space refinement, the domains of  
473 RNAP were rigid-body refined and then subsequently refined with secondary structure,  
474 Ramachandran, rotamer and reference model restraints. To refine the structures of RP1-  
475 DksA/ppGpp and RP2-DksA/ppGpp, *E. coli* RNAP and DksA/ppGpp complex crystal structures  
476 (PDB: 5VSW) were manually fit into the cryo-EM density map using Chimera. DNA was  
477 manually built by using Coot<sup>48</sup>. The structure was refined by the same method as the closed and  
478 open complex structures.

479

480 **Preparation of RNAP and transcription factors for *in vitro* transcription.** Mutant variants of  
481 RNAP,  $\sigma^{70}$  and DksA were obtained by site-directed mutagenesis. The D256A substitution in the  
482  $\beta'$  subunit was obtained in pVS10 encoding all RNAP subunits, with the *rpoC* gene containing a  
483 C-terminal His<sub>6</sub>-tag<sup>49</sup>. The  $\sigma^{70}$  and DksA variants containing an N-terminal His<sub>6</sub>-tag were cloned  
484 into pET28. To obtain  $\sigma_{\Delta 1.1}$ , the 5'-terminal part of the *rpoD* gene encoding residues 2-94 was  
485 deleted. To obtain  $\sigma_{\Delta AL}$ , codons 168-212 were replaced with three glycine codons. All proteins  
486 were expressed in *E. coli* BL21(DE3). The wild-type and mutant core RNAPs were purified using  
487 Polymin P precipitation followed by heparin (HiTrap Heparin column), Ni-affinity (HisTrap HP  
488 column) and anion exchange (MonoQ column) chromatography steps (all columns from GE  
489 Healthcare) as described previously<sup>49</sup>. The wild-type and mutant  $\sigma^{70}$  factors were purified from  
490 inclusion bodies with subsequent renaturation and Ni-affinity chromatography as previously  
491 described<sup>27</sup>. The  $\sigma_{\Delta 1.1}$  protein was subjected to thrombin protease (GE Healthcare) treatment in  
492 PBS buffer (10 hours of incubation at 4 °C with 10 units of protease per mg of protein), followed  
493 by incubation with Ni-NTA agarose (GE Healthcare) to remove the His-tag and His-tagged  
494 thrombin. To purify DksA, a bacterial pellet from 0.5 liters of cell culture was resuspended in 25  
495 ml of lysis buffer (50 mM Tris-HCl, pH 7.9, 250 mM NaCl, 10 mM EDTA, 0.5 mM  
496 phenylmethylsulfonyl fluoride, 1 mM 2-mercaptoethanol, 0.1 mM ZnCl<sub>2</sub>) and lysed using a French  
497 press. The supernatant obtained after centrifugation was loaded onto a 5-ml HiTrap chelating  
498 column (GE Healthcare) charged with Ni<sup>2+</sup> and equilibrated with loading buffer (10 mM Tris-HCl,  
499 pH 7.9, 500 mM NaCl, 0.5 mM 2-mercaptoethanol, 0.1 mM ZnCl<sub>2</sub>). The column was washed with  
500 the same buffer containing 60 mM imidazole, and DksA was eluted with buffer containing 300  
501 mM imidazole and dialyzed overnight against 50 mM Tris-HCl, 300 mM NaCl, 1 mM DTT, and  
502 0.1 mM ZnCl<sub>2</sub>. Glycerol was added to 50%, and aliquots were stored at -70 °C.



503

504 **Transcription *in vitro*.** Analysis of transcription *in vitro* was performed using a supercoiled  
505 pTZ19 template containing *rrnBP1* cloned 88 nt upstream of a *his* terminator (Pupov et al., 2018);  
506 the second transcript monitored in the assays was 110 nt RNA-I encoded by the *ori* region of the  
507 plasmid. For measurements of promoter complex stabilities, promoter complexes were prepared  
508 by mixing core RNAP (100 nM final concentration) with wild-type or mutant  $\sigma^{70}$  factors (250 nM)  
509 in transcription buffer (40 mM Tris-HCl, pH 7.9, 10 mM MgCl<sub>2</sub>, 40 mM KCl) and supercoiled  
510 plasmid DNA (10 nM), followed by incubation for 7 min at 37 °C. DksA and ppGpp were added  
511 at 2  $\mu$ M and 200  $\mu$ M, respectively, when indicated. An upstream fork-junction competitor DNA  
512 was added (template strand 5'-ACGAGCCGGAAGCAT, nontemplate strand 5'-  
513 ATGCTTCCGGCTCGTATAATGTGTGGAA; the -10 sequence is underlined) to 2  $\mu$ M, and the  
514 samples were incubated at 37 °C for the indicated time intervals. NTP substrates were added to  
515 final concentrations of 200  $\mu$ M ATP, CTP, GTP, and 10  $\mu$ M UTP, with the addition of  $\alpha$ -[<sup>32</sup>P]-  
516 UTP together with rifampin (5  $\mu$ g/ml) to prevent reinitiation. The reactions were stopped after 5  
517 min with 8 M urea and 20 mM EDTA, and RNA products were separated by 15% denaturing  
518 PAGE, followed by phosphor imaging. To calculate the observed half-life times for promoter  
519 complex dissociation ( $t_{1/2}$ ), the data were fitted to the one-exponential equation  $A = A_0 \times \exp(-t$   
520  $\times k_{\text{obs}})$ , where A is the RNAP activity at a given time point after competitor addition,  $A_0$  is the  
521 activity measured in the absence of the competitor,  $k_{\text{obs}}$  is the observed rate constant, and  $t_{1/2} =$   
522  $\ln 2/k_{\text{obs}}$ .

523 For measurements of apparent DksA affinities, promoter complexes were prepared in the same  
524 way with 50 nM core RNAP, 250 nM  $\sigma^{70}$  (250 nM) and 2 nM supercoiled plasmid DNA in  
525 transcription buffer containing 100  $\mu$ g/ml BSA for 7 min at 37 °C, followed by the addition of  
526 DksA (from 10 nM to 10  $\mu$ M), either in the absence or in the presence of ppGpp (100  $\mu$ M).  
527 Transcription was performed for 15 min at 37 °C with 200  $\mu$ M ATP, CTP, GTP, and 10  $\mu$ M UTP  
528 (plus  $\alpha$ -[<sup>32</sup>P]-UTP), and RNA products were analyzed as described above. The apparent  
529 dissociation constant values ( $K_{\text{d,app}}$ ) were calculated from the hyperbolic equation:  $A = A_{\text{max}} \times (1$   
530  $- [\text{DksA}]/(K_{\text{d,app}} + [\text{DksA}]))$ , where A is the observed RNAP activity and  $A_{\text{max}}$  is the RNAP activity  
531 measured in the absence of DksA.

532



533 **DNA duplex free energy calculation.** DNA duplex free energies were analyzed based on nearest-  
534 neighbor thermodynamics<sup>50,51</sup>. Briefly, the Python script was written to read a sequence from a  
535 text file, calculate the DNA duplex free energy of dinucleotides, sum these values over an 8-base  
536 window and report these sums for the first base of the central nucleotide of the window (e.g., sum  
537 for the first window base 1-8 will be reported for base 4).

538

539 **Data Availability.** The cryo-EM density maps have been deposited in EMDataBank under  
540 accession codes EMDB: EMD-21879 (RPc), EMD-21880 (RPo), EMD-21881 (RP1-  
541 DksA/ppGpp), and EMD-21883 (RP2-DksA/ppGpp). Atomic coordinates for the reported cryo-  
542 EM structures have been deposited with the Protein Data Bank under accession numbers 6WR6,  
543 6WR8, 6WRD and 6WRG.

544

#### 545 **ACKNOWLEDGMENTS**

546 We thank Carol Bator at the Penn State Huck Institute Cryo-EM facility for supporting the cryo-  
547 EM data collections. We thank Christian Dienemann at the Max Planck Institute for providing the  
548 DNA duplex free energy calculation methodology. This research was, in part, supported by the  
549 National Cancer Institute's National Cryo-EM Facility at the Frederick National Laboratory for  
550 Cancer Research under contract HSSN261200800001E. This work was supported by NIH grants  
551 (R01 GM087350 and R35 GM131860 to K.S.M.) and Russian Science Foundation (19-14-00359)  
552 and Russian Foundation for Basic Research (18-34-20095) to A.K.

553

#### 554 **AUTHOR CONTRIBUTIONS**

555 Y.S. prepared samples and cryo-EM grids. Y.S. and M.Z.Q. collected and processed cryo-EM data.  
556 K.S.M. built, refined and validated the structures. D.P. and D.E. performed biochemical assays  
557 under supervision of A.K. K.S.M. designed and supervised research. All authors participated in  
558 the interpretation of the results and in writing the manuscript.

559

560 **Competing interest** The authors declare no competing interests.

561

562 **Correspondence and requests for materials** should be addressed to K.S.M. or A.K.

563

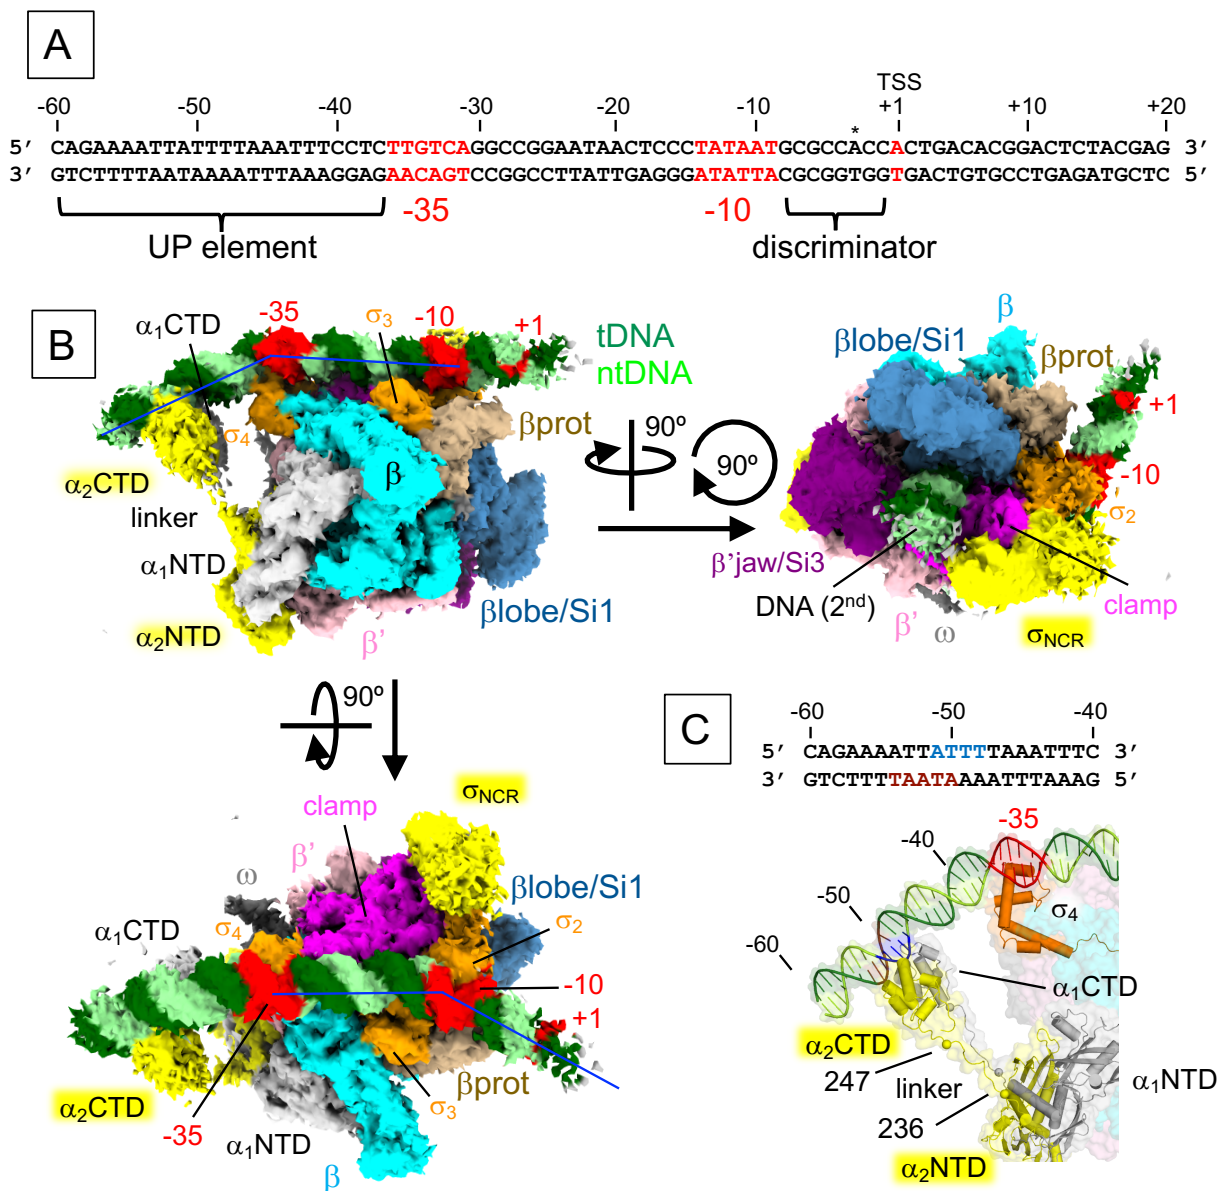

564

565 **Figure 1. Cryo-EM structure of the RNAP - *rrnBP1* closed complex (RPC).** A) The sequence  
 566 of the *E. coli rrnBP1* promoter DNA used for cryo-EM. The UP element, -35 element, -10 element,  
 567 transcription start site (TSS, +1) and discriminator sequence are indicated. An altered TSS from  
 568 the nonscrunched open complex is indicated by an asterisk. B) Orthogonal views of the RPC cryo-  
 569 EM density map. Subunits and domains of RNAP and DNA are colored and labeled ( $\beta$ prot,  
 570  $\beta$ protrusion; tDNA, template DNA; ntDNA, nontemplate DNA). The density of downstream DNA  
 571 beyond the +4 position is not traceable. Blue lines denote the direction of the DNA axis, with kinks  
 572 at approximately -37 and -13. The second DNA at the RNAP cleft is indicated (DNA (2<sup>nd</sup>)). C) A  
 573 magnified view showing the  $\alpha$ CTDs and UP element interaction. The domains of  $\alpha$  subunits,  $\sigma_4$   
 574 and DNA are depicted as ribbon models with a partially transparent surface. At the top, the  
 575 sequence of the UP element is shown. The ntDNA (-51 to -48) and tDNA (-54 to -50) sequences  
 576 binding  $\alpha_1$ CTD and  $\alpha_2$ CTD are highlighted in blue and brown, respectively.

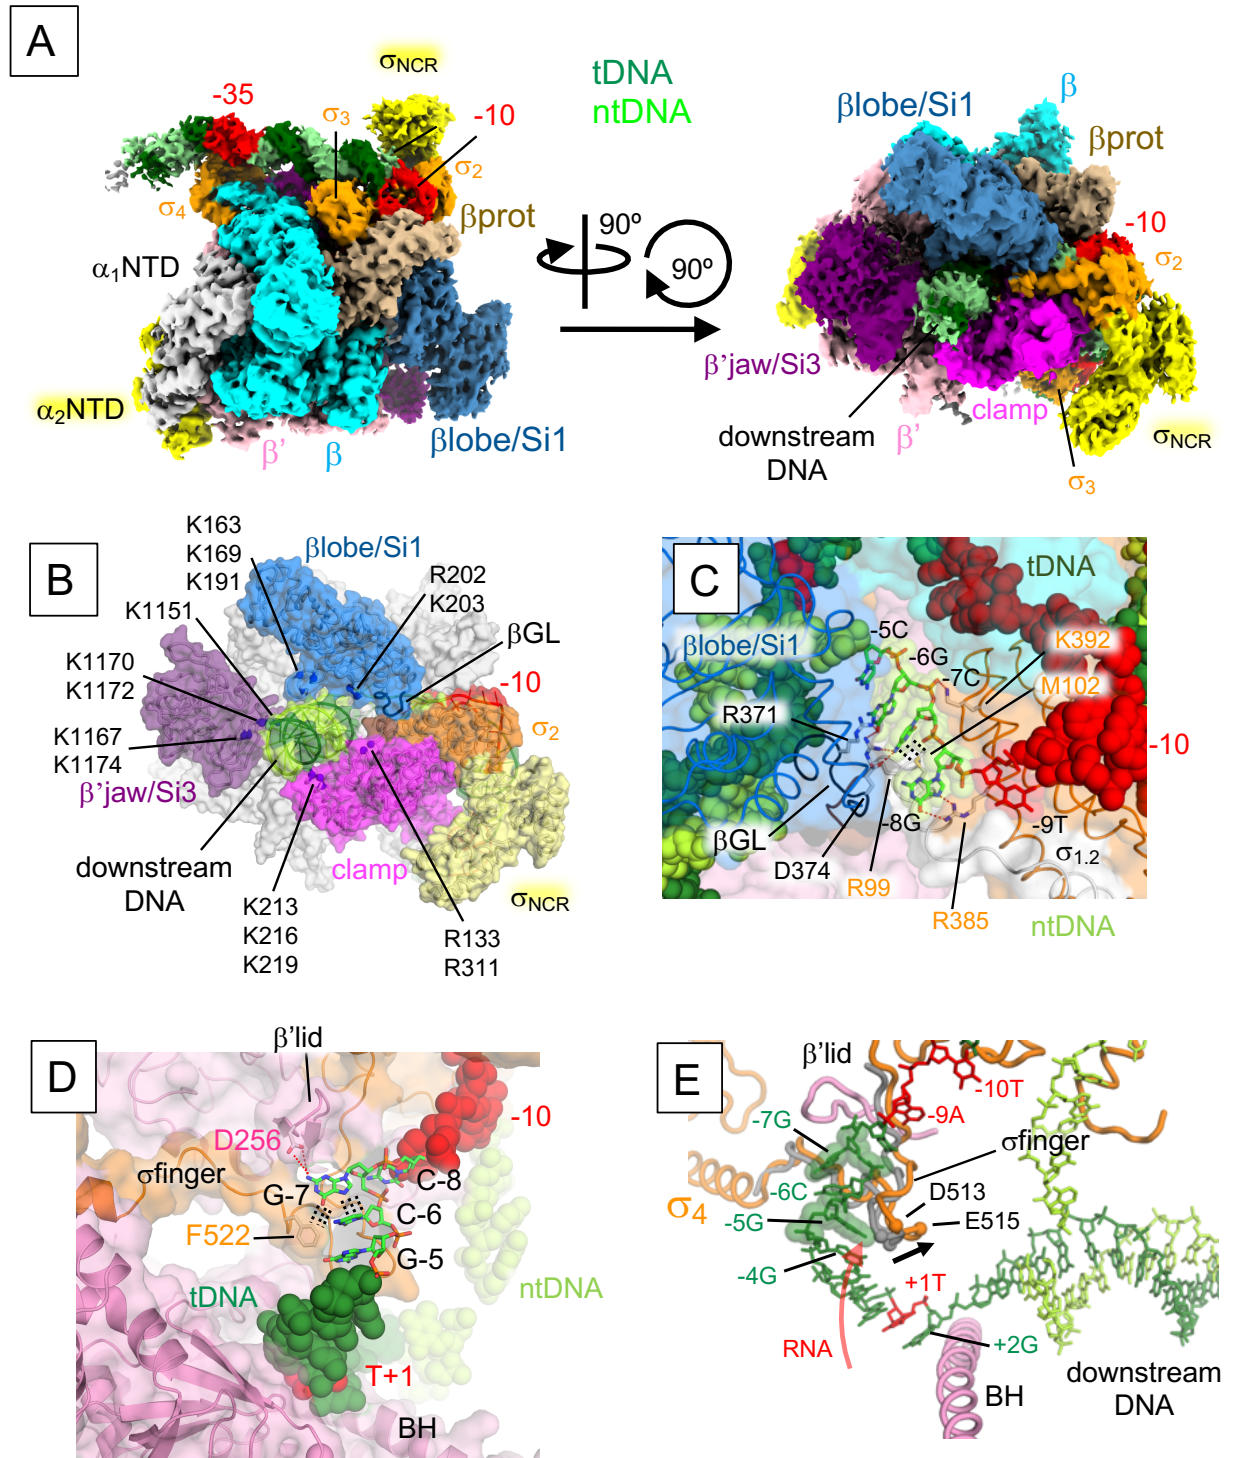

577

578 **Figure 2. Cryo-EM structure of the RNAP – *rrnBP1* open complex (RPO).** **A)** Orthogonal  
 579 views of the RPO cryo-EM density map. Subunits and domains of RNAP and DNA are colored  
 580 and labeled the same as in Fig. 1B. **B)** The structure of the RPO, highlighting basic residues of the  
 581  $\beta$ lobe/Si1 (blue),  $\beta'$ jaw/Si3 (purple) and  $\beta'$ clamp (pink) interacting with downstream DNA (green)  
 582 to stabilize the RPO. The structure is shown as a ribbon model with a transparent surface, and the  
 583 basic residues are shown as spheres and labeled. **C)** Close-up view of RNAP ( $\beta$ GL,  $\sigma_{1.1}$  and  $\sigma_{1.2}$ )

584 and discriminator DNA (ntDNA) interaction.  $\beta$  and  $\sigma$  are depicted as ribbon models with  
585 transparent surfaces, and DNA is shown as CPK spheres. The G-8, C-7 and G-6 bases (stick model  
586 with transparent CPK spheres) that form salt bridges and Van del Waals interactions with residues  
587 from the  $\beta$ GL and  $\sigma_{1,2}$  (side chains shown as sticks;  $\beta$ GL R371 and D374;  $\sigma_{1,2}$  R99 and M102) are  
588 shown (depicted by red and black dashed lines). **D**) Close-up view of the RNAP ( $\beta'$ lid and  $\sigma$ finger)  
589 and discriminator DNA (tDNA) interaction. The G-7 base inserts into the pocket formed by the  
590  $\beta'$ lid,  $\sigma$ finger and C-6 base.  $\beta'$  and  $\sigma$  are depicted as ribbon models with transparent surfaces, and  
591 DNA is shown as a stick model and CPK representation. The residues forming salt bridges and  
592 Van del Waals interactions with the G-7 base are shown (depicted by red and black dashed lines).  
593 **E**) Comparison of the  $\sigma$ finger in RPo-*rrnBP1* (this study, orange) and RPo-*rpsTP2*<sup>13</sup> (gray). The  
594 RPo-*rrnBP1* structure is depicted as cartoon (RNAP) and stick (DNA) models with the  $\sigma$ finger  
595 from RPo-*rpsTP2* (gray). When the *rrnBP1* tDNA scrunches at the -7G(t) position, -5G(t) is  
596 located below the  $\sigma$ finger (orange), which shifts the  $\sigma$ finger position compared to that in  
597 nonscrunched RPo. The  $\sigma$ finger dislocation (black arrow, 5 Å at E515) makes additional space for  
598 RNA extension (red arrow).  
599  
600

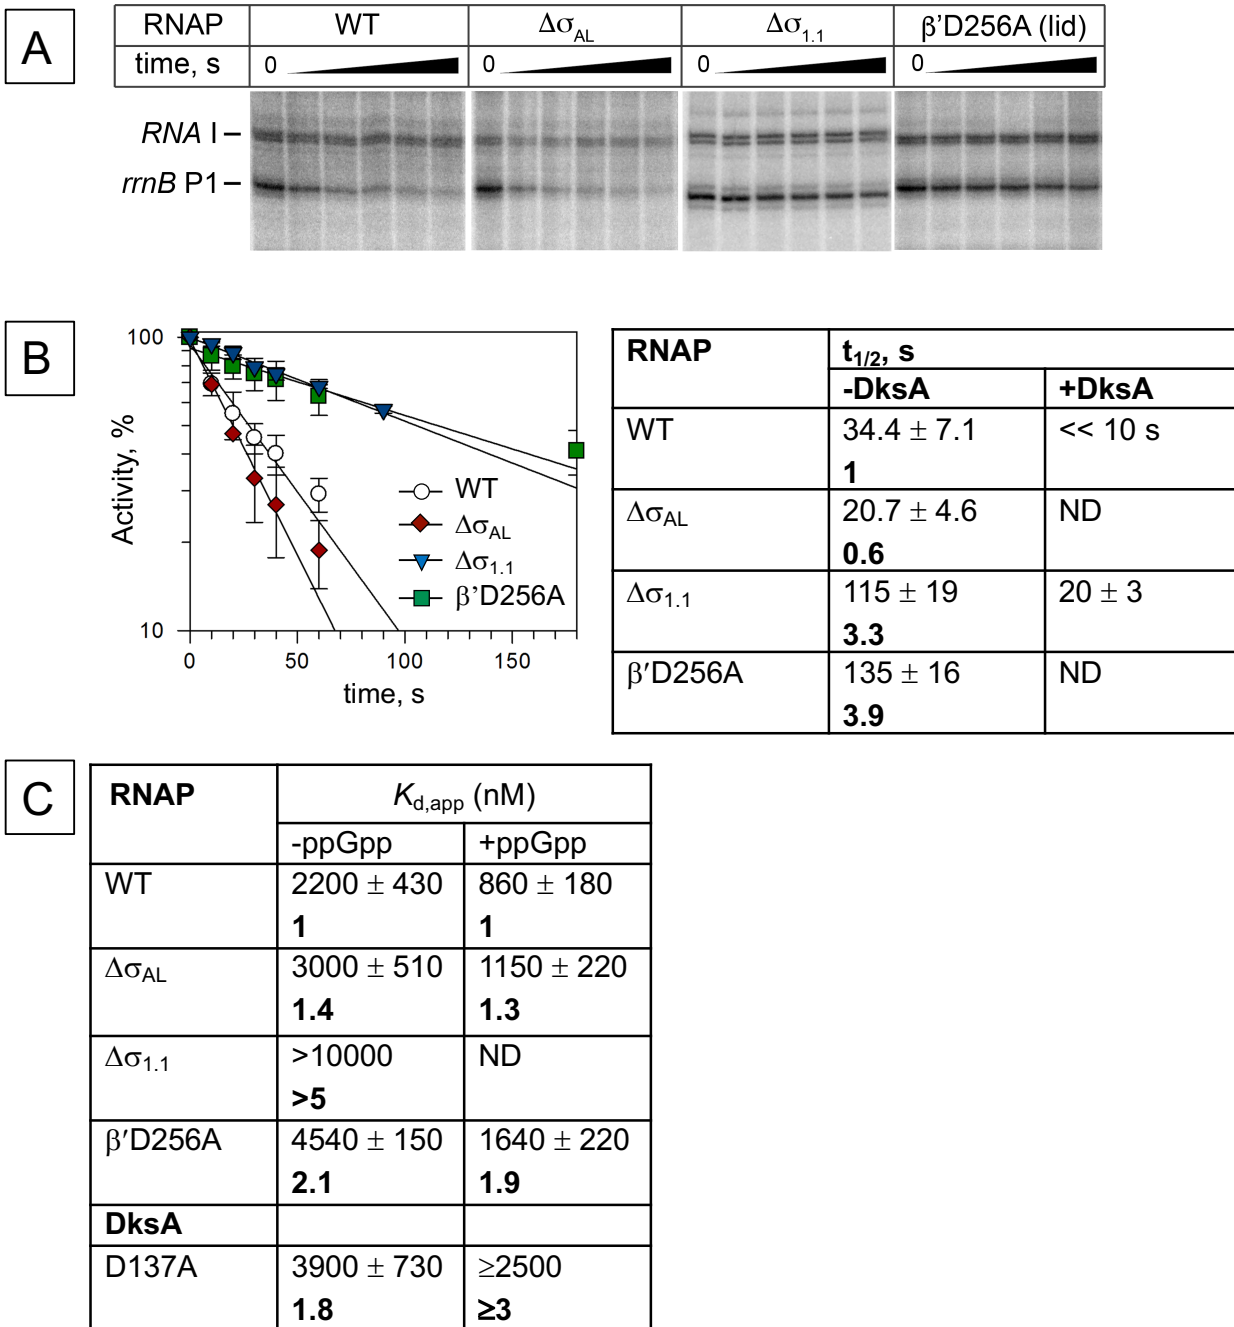

601  
602

603 **Figure 3. Stabilities of *rrnBP1* promoter complexes formed by wild-type and mutant RNAPs**  
 604 **and their sensitivities against DksA/ppGpp.** **A)** Sensitivity of *rrnBP1* promoter complexes to  
 605 heparin. Preformed promoter complexes were incubated with heparin for the indicated time  
 606 intervals, followed by the addition of NTPs and rifapentin. **B)** Kinetics of promoter complex  
 607 dissociation for wild-type and mutant RNAPs. The half-lives of the promoter complexes for each  
 608 RNAP are shown in the table to the right (mean values and standard deviations from three  
 609 independent experiments). **C)** Apparent DksA affinities to wild-type and mutant RNAPs on the  
 610 *rrnBP1* promoter.

611



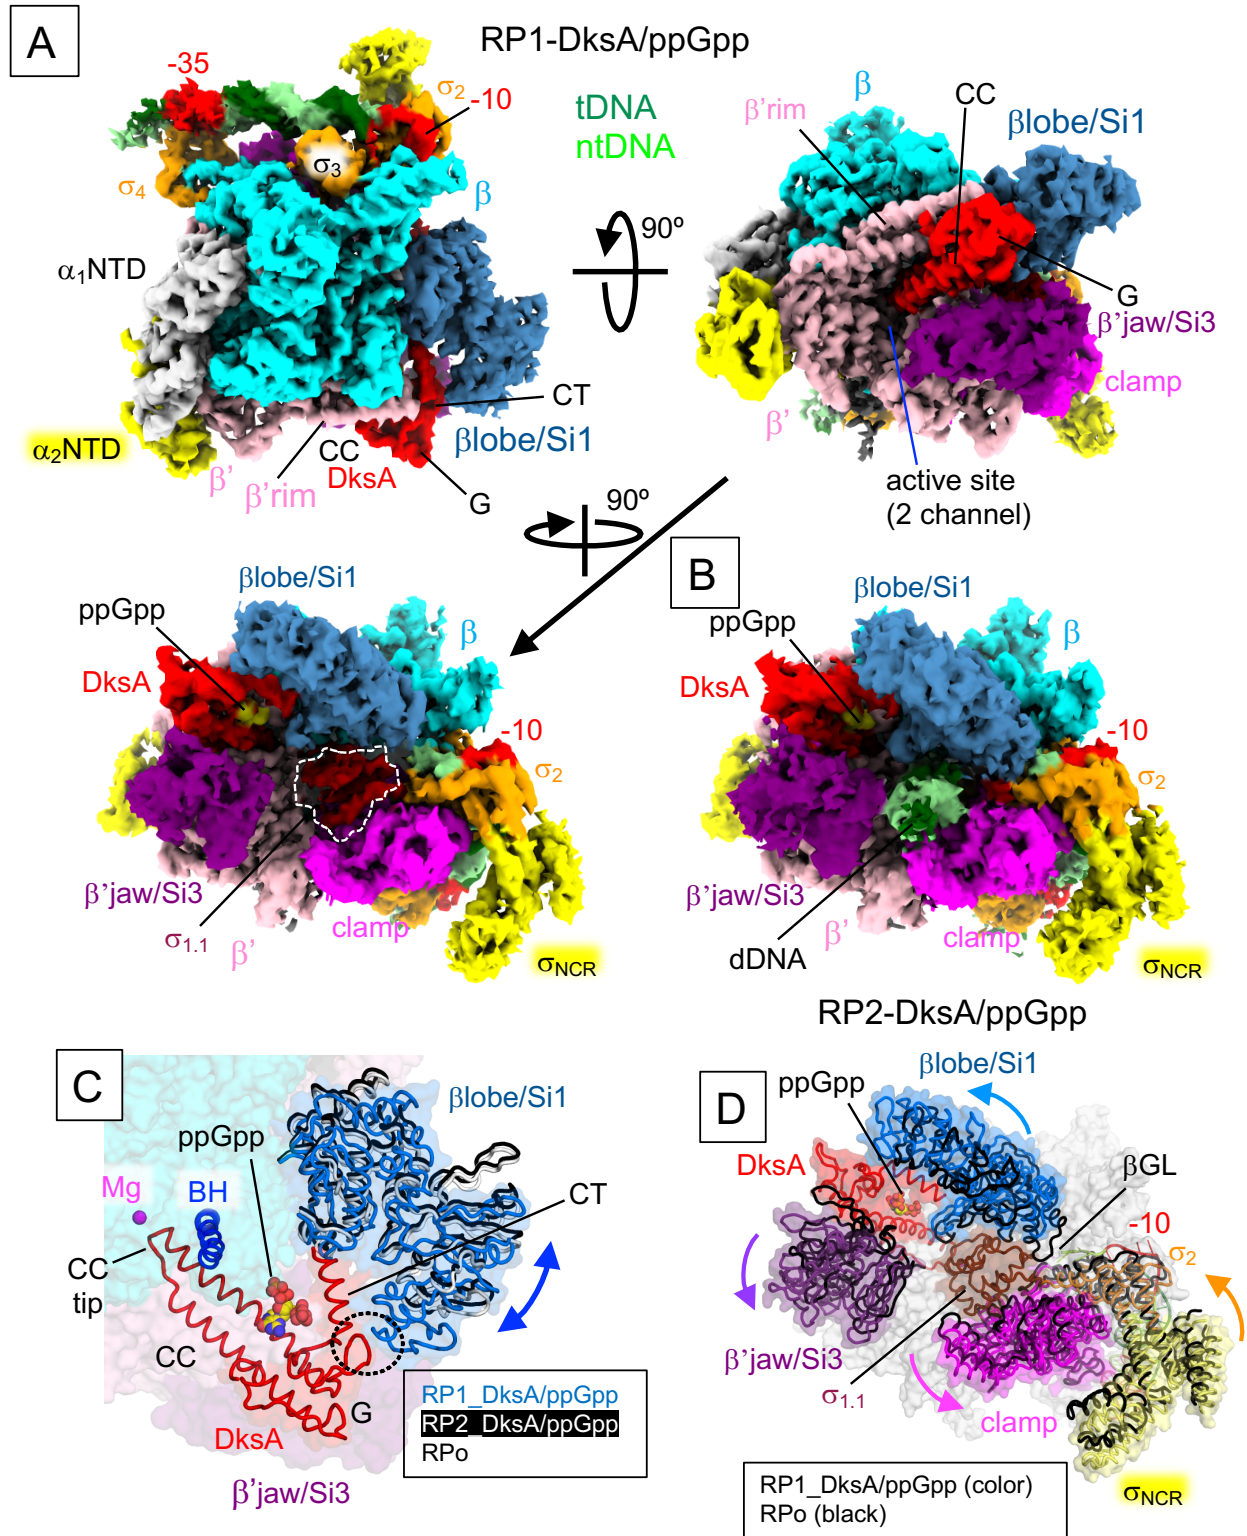

612  
613  
614  
615  
616

**Figure 4. Cryo-EM structures of the RNAP - *rrnBP1* complex with DksA/ppGpp (RP-DksA/ppGpp).** A) Orthogonal views of the RP1-DksA/ppGpp cryo-EM density map. DNA, RNAP and DksA (G, G domain; CC, CC domain; CT, CT-helix) are indicated and colored.  $\sigma_{1.1}$  is

617 highlighted by a white dash. **B)** The RP2-DksA/ppGpp cryo-EM density map. The downstream  
618 DNA is accommodated in the RNAP cleft. **C)** Close-up view of the  $\beta$ lobe/Si1 conformational  
619 changes upon DksA binding,  $\sigma_{1.1}$  ejection and downstream DNA binding. The structures of the  
620  $\beta$ lobe/Si1 in RP1-DksA/ppGpp (light blue), RP2-DksA/ppGpp (white) and RPo (black) are  
621 depicted as ribbon models with transparent surfaces and ribbon models (DksA, BH: bridge helix)  
622 of RP1-DksA/ppGpp. The interaction between  $\beta$ lobe/Si1 and DksA in RP1-DksA/ppGpp is  
623 highlighted by a black dashed oval. **D)** Conformational changes in the RNAP mobile domains  
624 upon binding of DksA/ppGpp. The structures of the RNAP mobile domains in RP1-DksA/ppGpp  
625 (colored) and RPo (black) are depicted as ribbon models with transparent surfaces of RP1-  
626 DksA/ppGpp.

627

628



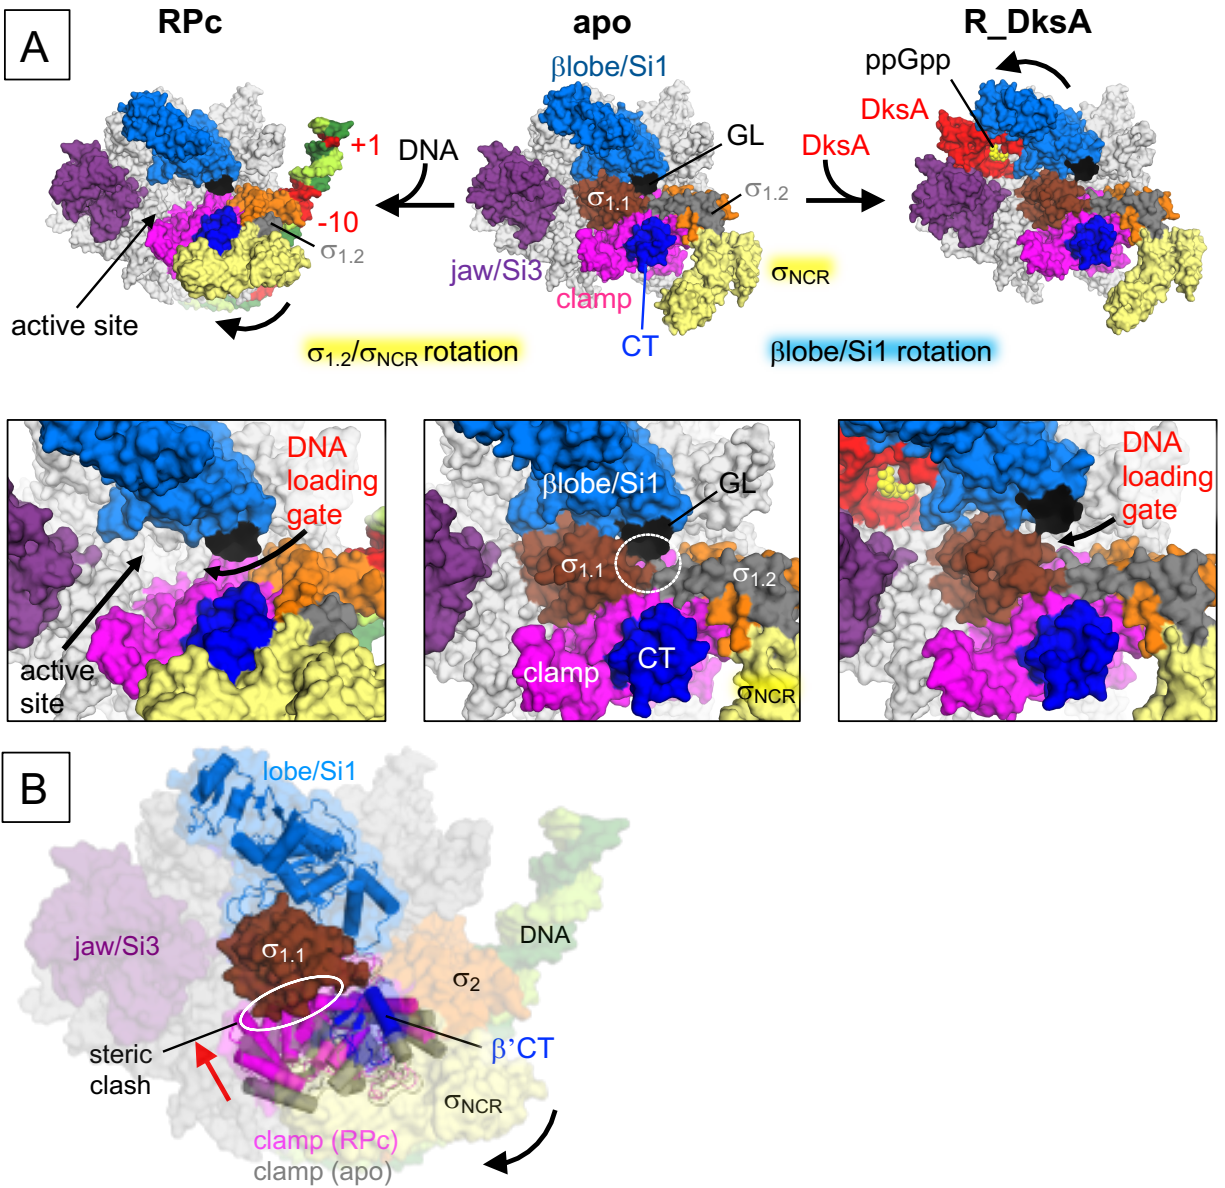

629  
630

631 **Figure 5. Opening the DNA loading gate by moving  $\sigma_{1.2}/\sigma_{NCR}$  or  $\beta$ lobe/Si1 domain.** **A)**  
 632 Comparison of the  $\sigma_{1.2}/\sigma_{NCR}$  and  $\beta$ lobe/Si1 conformations in apo-RNAP (middle), RPC (left) and  
 633 R\_DksA/ppGpp (right, DNA is removed from the RP1\_DksA/ppGpp). RNAP (subunits and  
 634 domains), DksA and DNA are indicated. Close-up views of the RNAP cleft are shown below. The  
 635 DNA loading gate is closed in the apo-RNAP due to  $\beta$ gate loop ( $\beta$ GL) contacts  $\sigma_{1.1}/\sigma_{1.2}$  (white  
 636 dashed oval). The opening of the DNA loading gate in RPC and RP1\_DksA/ppGpp is indicated by  
 637 blue and red arrows, respectively. **B)** A proposed model of  $\sigma_{1.1}$  ejection in the RPC. The RPC is  
 638 depicted as a transparent surface with cartoon models of the clamp (purple) and lobe/Si1 (blue).  
 639 The clamp in an apo-form RNAP and the lobe/Si1 in RP1-DksA/ppGpp are colored gray and white,  
 640 respectively. In the RPC, the  $\sigma_{NCR}$  rotation (back arrow) contacts the  $\beta$ 'CT, resulting in clamp  
 641 movement toward  $\sigma_{1.1}$  (red arrow) and a steric clash with  $\sigma_{1.1}$  (white oval).  
 642

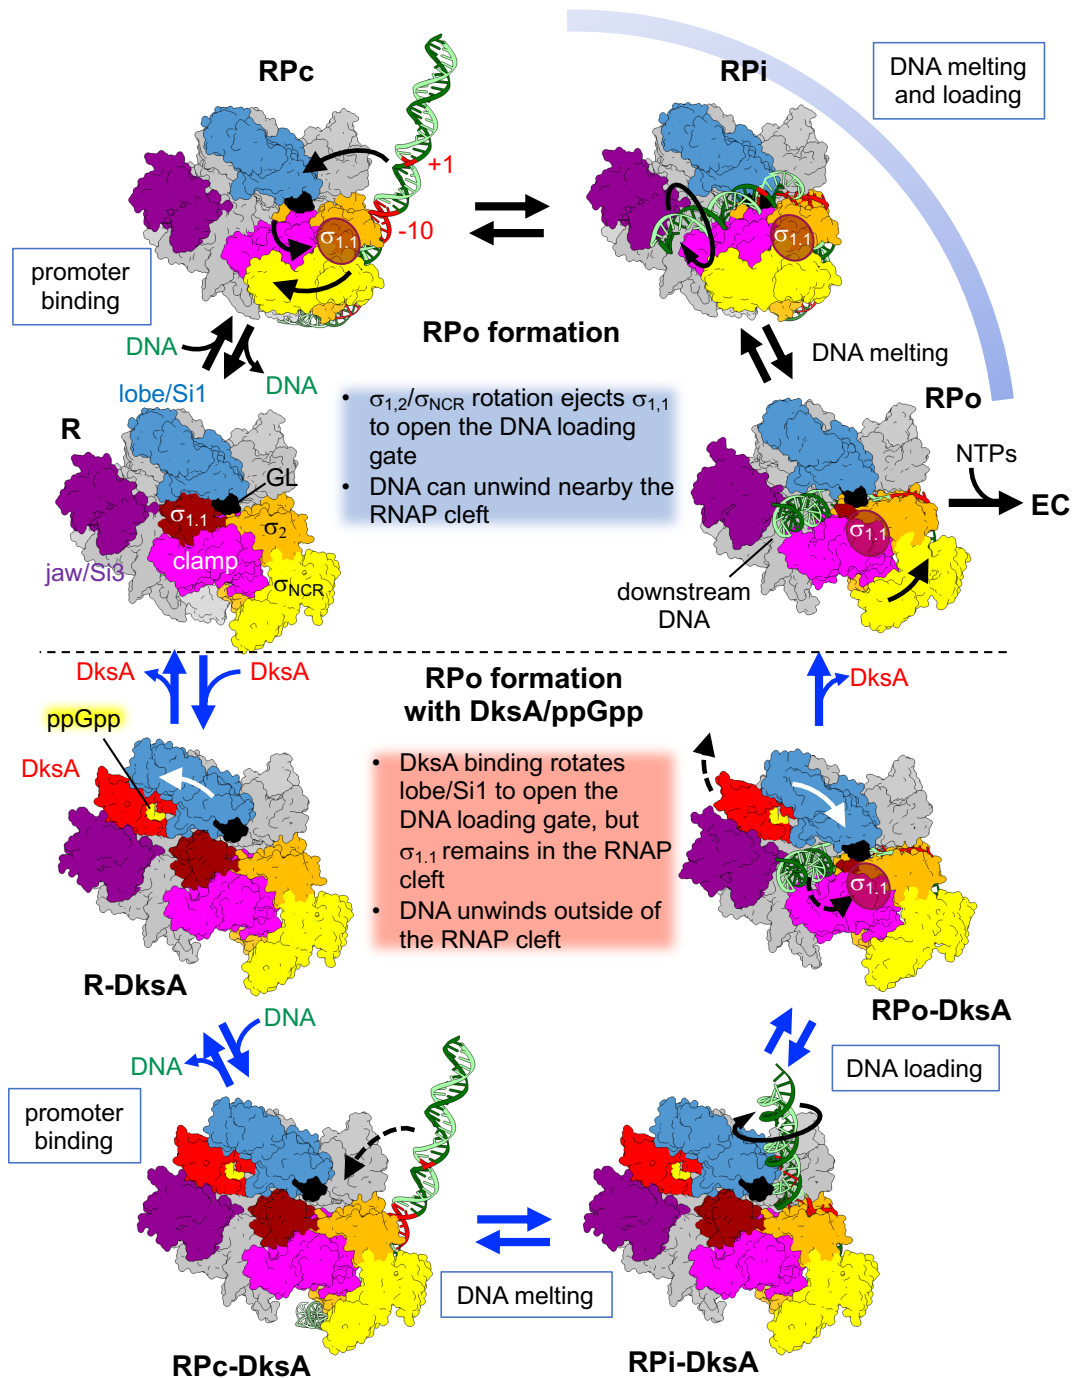

643  
644  
645  
646  
647  
648  
649  
650  
651  
652

**Figure 6. Alternative pathways for open promoter complex formation.** Two distinct pathways are shown for open promoter complex formation without (top, blue caption) and with DksA/ppGpp (bottom, red caption). The RNAP holoenzyme (clamp, pink;  $\sigma_{NCR}$ , yellow;  $\sigma_{1.1}$ , brown;  $\sigma_2$ , orange;  $\beta$ lobe/Si1, light blue; jaw/Si3, purple; rest of RNAP, gray), promoter DNA (tDNA, dark green; ntDNA, light green), DksA (red), and ppGpp (yellow) are shown. Only RPI is a hypothetical intermediate, but others (RPC, RPO, R-DksA, RPC-DksA, RPI-DksA and RPO-DksA) represent the structures determined in this and previous studies. EC, elongation complex.
